# Supplementary material
Source: PubMed Central journal article supplement (PMC5634937)
Supplement: NIHMS904519-supplement-SI.pdf [file NIHMS904519-supplement-SI.pdf]

## **Supporting Information**

# Characterizing Residue-Bilayer Interactions Using Gramicidin A as a Scaffold and Tryptophan Substitutions as Probes

Andrew H. Beaven, Alexander J. Sodt, Richard W. Pastor, Roger E. Koeppe II, Olaf S. Andersen, Wonpil Im

**Table S1.** System information. All systems have 90 lipids / leaflet. A “d” denotes a dimer simulation and an “m” denotes a monomer simulation. The  $gA^{\text{Trp}}$  simulations in  $dC_{20:1}$  and  $dC_{22:1}$  are taken from Sodt et al.<sup>1</sup>

| Mutant                  | Lipid Type           | ID          | System Size <sup>s</sup> | Water          | Total Atoms | Sim. Time [ns] |     |
|-------------------------|----------------------|-------------|--------------------------|----------------|-------------|----------------|-----|
| $gA^{\text{Trp}}$ d     | $dC_{18:1}$          | 1           | 79.7×79.7×70.0           | 6,802          | 45,835      | 220            |     |
|                         |                      | 2           | 79.7×79.7×70.0           | 6,756          | 45,697      | 220            |     |
|                         |                      | 3           | 79.7×79.7×70.0           | 6,743          | 45,658      | 220            |     |
|                         | $gA^{\text{Trp}}$ m  | $dC_{20:1}$ | 1                        | 80.0×80.0×86.0 | 8,148       | 52,050         | 110 |
|                         |                      |             | 1                        | 80.0×80.0×87.0 | 8,063       | 53,957         | 110 |
|                         |                      | $dC_{22:1}$ | 1                        | 79.3×79.3×88.0 | 8,119       | 51,965         | 110 |
| $gA^{\text{mTrp}}$ d    | $dC_{18:1}$          | 1           | 79.8×79.8×80.0           | 8,928          | 52,249      | 220            |     |
|                         |                      | 2           | 79.8×79.8×80.0           | 9,000          | 52,465      | 220            |     |
|                         |                      | 3           | 79.8×79.8×80.0           | 8,870          | 52,075      | 220            |     |
|                         | $dC_{20:1}$          | 1           | 80.0×80.0×86.0           | 7,789          | 50,997      | 140            |     |
|                         |                      | 2           | 80.0×80.0×86.0           | 7,774          | 50,952      | 170            |     |
|                         |                      | 3           | 80.0×80.0×86.0           | 7,796          | 51,018      | 130            |     |
|                         | $dC_{22:1}$          | 1           | 80.0×80.0×87.0           | 7,775          | 53,117      | 130            |     |
|                         |                      | 2           | 80.0×80.0×87.0           | 7,789          | 53,159      | 130            |     |
|                         |                      | 3           | 80.0×80.0×87.0           | 7,803          | 53,201      | 130            |     |
|                         | $gA^{\text{mTrp}}$ m | $dC_{20:1}$ | 1                        | 79.4×79.4×88.0 | 8,164       | 52,124         | 150 |
|                         |                      |             | 2                        | 79.4×79.4×88.0 | 8,170       | 52,142         | 130 |
|                         |                      |             | 3                        | 79.4×79.4×88.0 | 8,160       | 52,112         | 80  |
|                         |                      | $dC_{22:1}$ | 1                        | 79.3×79.3×90.0 | 8,241       | 54,517         | 130 |
|                         |                      |             | 2                        | 79.3×79.3×90.0 | 8,217       | 54,445         | 130 |
|                         |                      |             | 3                        | 79.3×79.3×90.0 | 8,196       | 54,382         | 130 |
| $gA^{\text{nc-mTrp}}$ d | $dC_{18:1}$          | 1           | 79.8×79.8×80.0           | 8,917          | 52,216      | 220            |     |
|                         |                      | 2           | 79.8×79.8×80.0           | 8,887          | 52,126      | 220            |     |
|                         |                      | 3           | 79.8×79.8×80.0           | 8,870          | 52,075      | 220            |     |
|                         | $dC_{20:1}$          | 1           | 79.4×79.4×86.0           | 7,708          | 50,754      | 100            |     |
|                         |                      | 2           | 79.4×79.4×86.0           | 7,689          | 50,697      | 100            |     |
|                         |                      | 3           | 79.4×79.4×86.0           | 7,683          | 50,679      | 100            |     |
|                         | $dC_{22:1}$          | 1           | 79.3×79.3×87.0           | 7,634          | 52,692      | 100            |     |
|                         |                      | 2           | 79.3×79.3×87.0           | 7,651          | 52,743      | 100            |     |
|                         |                      | 3           | 79.3×79.3×87.0           | 7,656          | 52,758      | 100            |     |
| $gA^{\text{nc-mTrp}}$ m | $dC_{20:1}$          | 1           | 79.4×79.4×88.0           | 8,172          | 52,148      | 100            |     |
|                         |                      | 2           | 79.4×79.4×88.0           | 8,170          | 52,142      | 100            |     |
|                         |                      | 3           | 79.4×79.4×88.0           | 8,181          | 52,175      | 100            |     |
|                         | $dC_{22:1}$          | 1           | 79.3×79.3×90.0           | 8,205          | 54,409      | 100            |     |
|                         |                      | 2           | 79.3×79.3×90.0           | 8,216          | 54,442      | 100            |     |
|                         |                      | 3           | 79.3×79.3×90.0           | 8,241          | 54,517      | 100            |     |

|                     |                    |   |                |       |        |     |
|---------------------|--------------------|---|----------------|-------|--------|-----|
| gA <sup>Tyr</sup> d | dC <sub>18:1</sub> | 1 | 79.5×79.5×80.0 | 8,893 | 52,094 | 220 |
|                     |                    | 2 | 79.5×79.5×80.0 | 8,835 | 51,920 | 220 |
|                     |                    | 3 | 79.5×79.5×80.0 | 8,927 | 52,196 | 220 |
|                     | dC <sub>22:1</sub> | 1 | 79.0×79.0×87.0 | 7,554 | 52,404 | 100 |
|                     |                    | 2 | 79.0×79.0×87.0 | 7,568 | 52,446 | 100 |
|                     |                    | 3 | 79.0×79.0×87.0 | 7,544 | 52,374 | 100 |
| gA <sup>Tyr</sup> m | dC <sub>22:1</sub> | 1 | 79.0×79.0×90.0 | 8,208 | 54,370 | 100 |
|                     |                    | 2 | 79.0×79.0×90.0 | 8,208 | 54,370 | 100 |
|                     |                    | 3 | 79.0×79.0×90.0 | 8,208 | 54,370 | 100 |
| gA <sup>Phe</sup> d | dC <sub>18:1</sub> | 1 | 79.5×79.5×80.0 | 8,889 | 52,074 | 220 |
|                     |                    | 2 | 79.5×79.5×80.0 | 8,852 | 51,963 | 220 |
|                     |                    | 3 | 79.5×79.5×80.0 | 8,852 | 51,963 | 220 |
|                     | dC <sub>22:1</sub> | 1 | 79.0×79.0×87.0 | 7,541 | 52,357 | 100 |
|                     |                    | 2 | 79.0×79.0×87.0 | 7,528 | 52,318 | 100 |
|                     |                    | 3 | 79.0×79.0×87.0 | 7,545 | 52,370 | 100 |
| gA <sup>Phe</sup> m | dC <sub>22:1</sub> | 1 | 79.0×79.0×90.0 | 8,161 | 54,221 | 100 |
|                     |                    | 2 | 79.0×79.0×90.0 | 8,149 | 54,185 | 100 |
|                     |                    | 3 | 79.0×79.0×90.0 | 8,112 | 54,075 | 100 |
| gA <sup>Gln</sup> d | dC <sub>18:1</sub> | 1 | 79.4×79.4×80.0 | 8,856 | 51,951 | 220 |
|                     |                    | 2 | 79.4×79.4×80.0 | 8,827 | 51,864 | 220 |
|                     |                    | 3 | 79.4×79.4×80.0 | 8,845 | 51,918 | 220 |
| gA <sup>Leu</sup> d | dC <sub>18:1</sub> | 1 | 79.4×79.4×80.0 | 8,818 | 51,853 | 220 |
|                     |                    | 2 | 79.4×79.4×80.0 | 8,832 | 51,895 | 220 |
|                     |                    | 3 | 79.4×79.4×80.0 | 8,834 | 51,901 | 220 |

---

**Table S2.** Average channel tilt angles (mean  $\pm$  standard error). Channels with residues (at positions 9, 11, 13 and 15) that can hydrogen bond have less tilt.

| Channel                      | Tilt Angle [ $^{\circ}$ ] |
|------------------------------|---------------------------|
| $\text{gA}^{\text{Trp}}$     | $9.3 \pm 0.7$             |
| $\text{gA}^{\text{mTrp}}$    | $12.4 \pm 0.3$            |
| $\text{gA}^{\text{nc-mTrp}}$ | $15.2 \pm 0.9$            |
| $\text{gA}^{\text{Tyr}}$     | $12.2 \pm 0.8$            |
| $\text{gA}^{\text{Phe}}$     | $13.8 \pm 0.4$            |
| $\text{gA}^{\text{Gln}}$     | $10.9 \pm 1.3$            |
| $\text{gA}^{\text{Leu}}$     | $15.0 \pm 1.7$            |

**Table S3.** Average count of phospholipid choline nitrogen atoms within  $r = 3 \text{ \AA}$  of the center of the channel pore (where they would block ion permeation). The channel's pore is aligned with the z-axis ( $xy = 0$ ) and the number of choline N is counted as a function of time. The presented value provides the time-averaged fraction of choline N in the vicinity of the pore. Residues that cannot hydrogen bond, and therefore impose fewer constraints on the lipids adjacent to the channel) increase the probability of finding a choline N near the pore.

| Channel               | Avg $\pm$ St Err |
|-----------------------|------------------|
| $gA^{\text{Trp}}$     | $0.12 \pm 0.02$  |
| $gA^{\text{mTrp}}$    | $0.26 \pm 0.03$  |
| $gA^{\text{nc-mTrp}}$ | $0.30 \pm 0.02$  |
| $gA^{\text{Tyr}}$     | $0.14 \pm 0.02$  |
| $gA^{\text{Phe}}$     | $0.27 \pm 0.02$  |
| $gA^{\text{Gln}}$     | $0.14 \pm 0.02$  |
| $gA^{\text{Leu}}$     | $0.29 \pm 0.01$  |

**Figure S1.** Previously published<sup>2</sup> (A) gA<sup>Trp</sup> monomer pore formation in dC<sub>12:0</sub> (1,2-di-lauroyl-PC, DLPC) in the left panel and dC<sub>14:0</sub> (1,2-di-myristoyl-PC, DMPC) in the right panel. (B) Monolayer hydrophobic thickness profiles in dC<sub>12:0</sub>, which show an asymmetry in monolayer deformations due to an asymmetric channel. Reprinted from Biophysical Journal, 102, T. Kim, K.I. Lee, P. Morris, R.W. Pastor, O.S. Andersen, and W. Im, Influence of Hydrophobic Mismatch on Structures and Dynamics of Gramicidin A and Lipid Bilayers, 1551–1560, 2012, with permission from Elsevier.

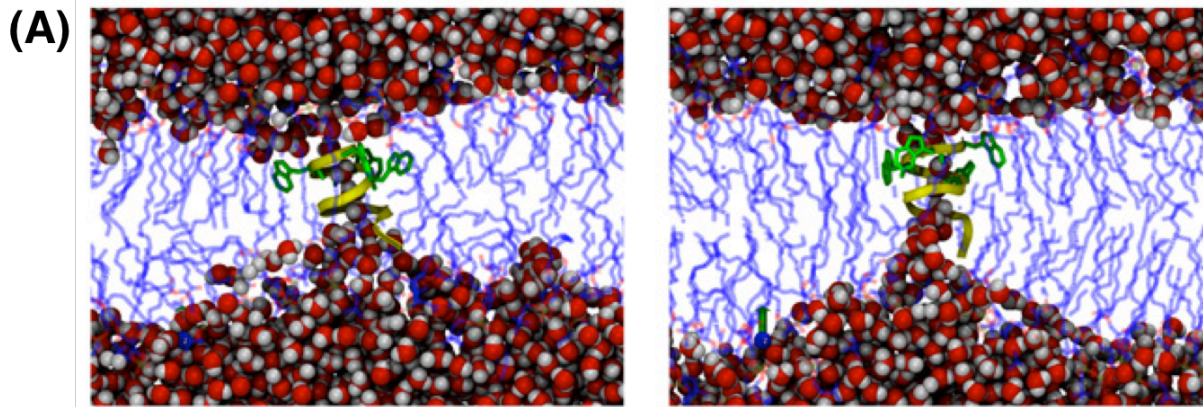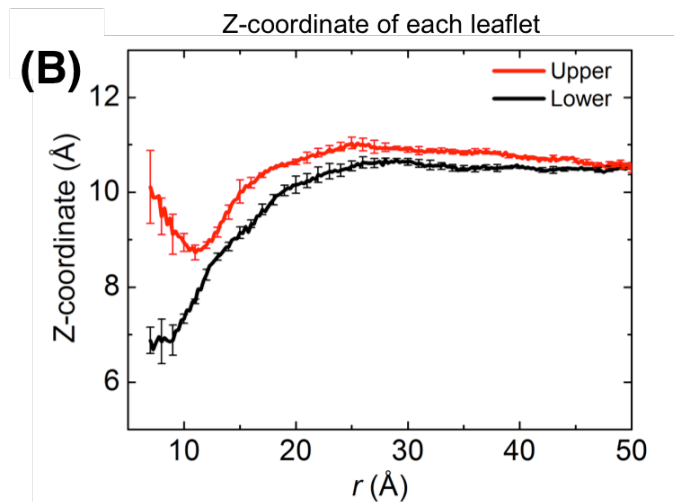

**Figure S2.**  $dC_{22:1}$  lipid *sn*-2 terminal carbon atom densities along the *z*-axis for both leaflets. The most populated *z* (for the bilayer) is at  $\sim 0$  Å, but the unsigned weighted averages are at  $\sim 3.7$  Å and  $\sim 3.3$  Å for the upper and lower leaflets, respectively.

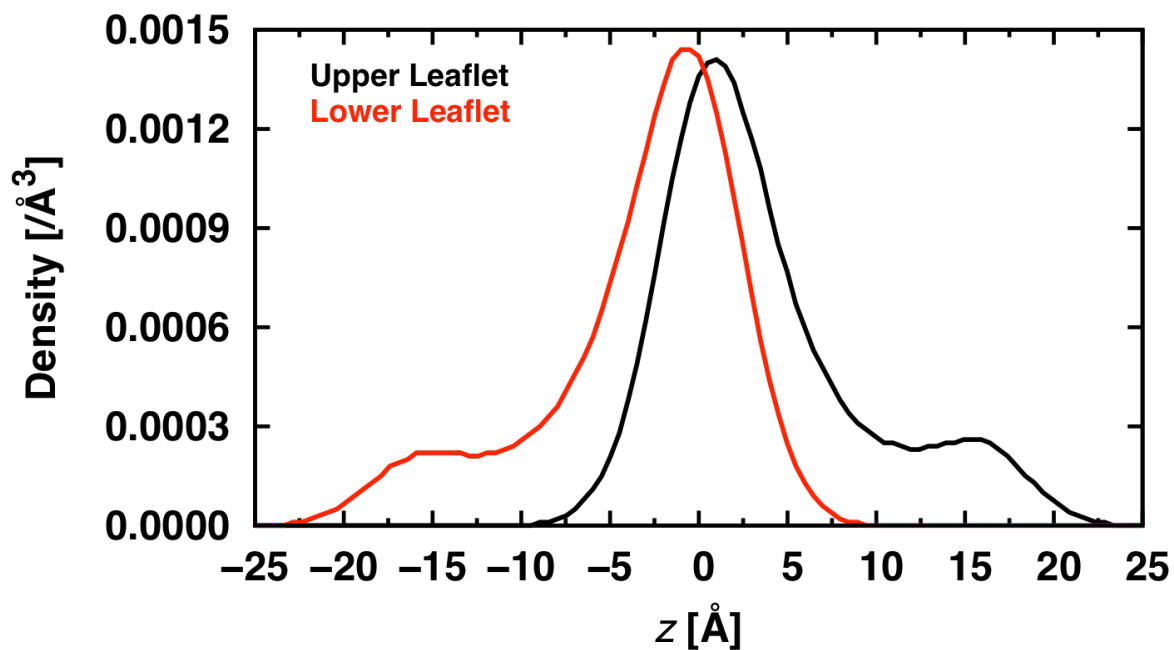

**Figure S3.** Heavy atom backbone root mean squared fluctuations (RMSF) for all channel types in dC<sub>18:1</sub>. The “X” residues are those that were mutated, and “EA” is ethanolamide.

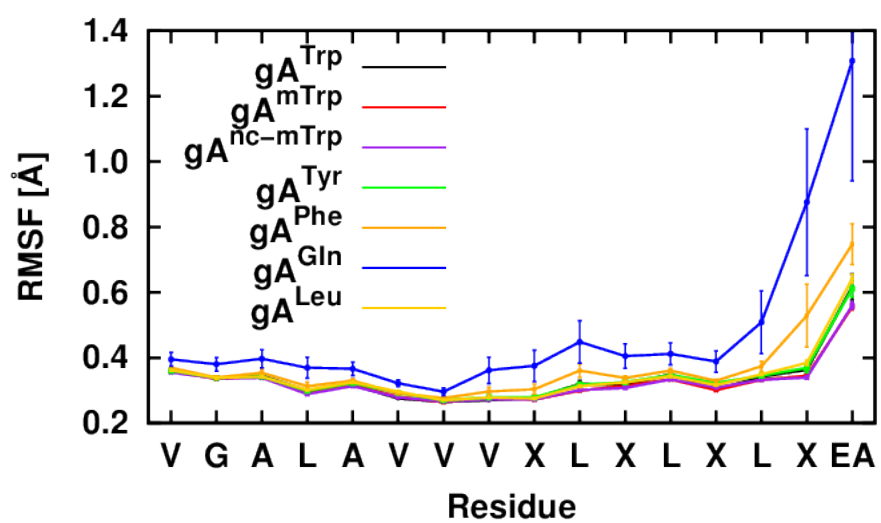



**Figure S4.** Time series of heavy atom backbone root mean square deviations (RMSD) for each channel type in dC<sub>18:1</sub> calculated relative to the minimized PDB:1JNO structure. Red, blue, and green are replicas 1, 2, and 3, respectively.

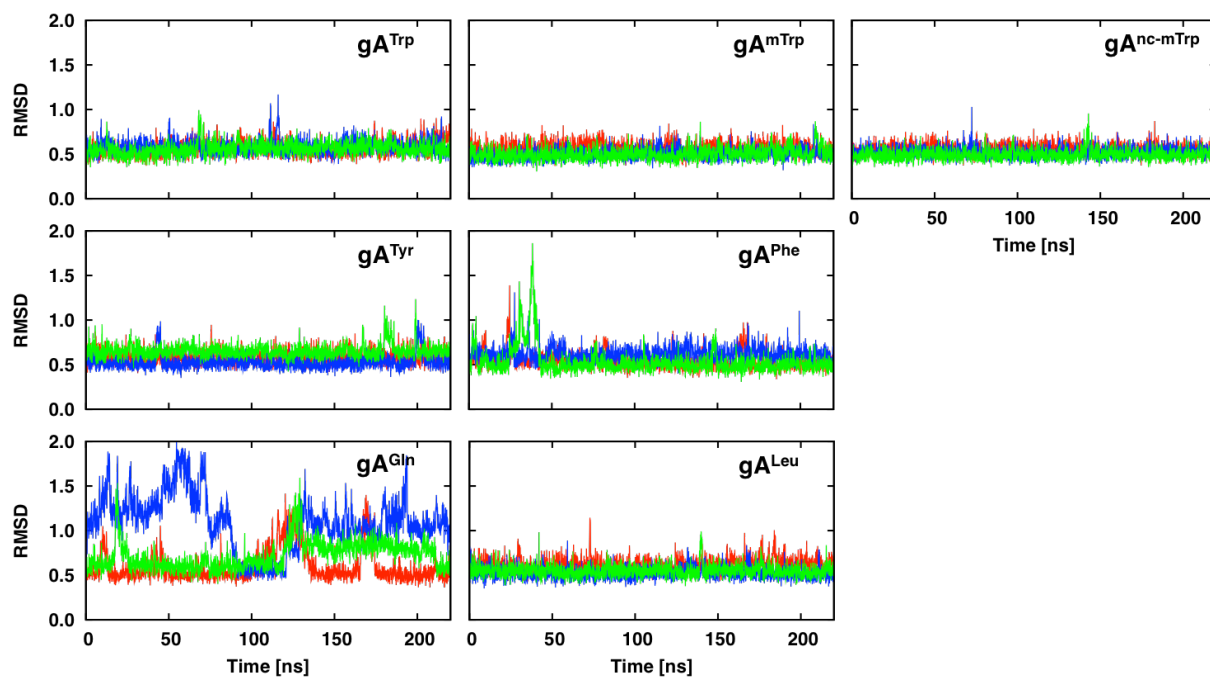

**Figure S5.** Channel tilt angle distributions for each channel type in  $dC_{18:1}$  with  $1^\circ$  bin width. Area under each curve equals unity.

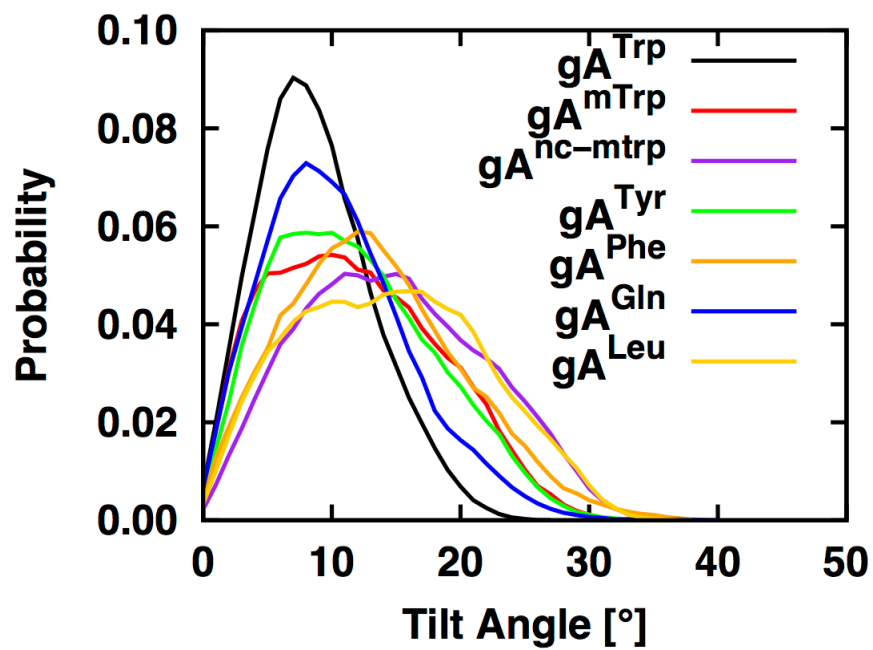

**Figure S6.** Tyr and Phe  $\chi_1$ - $\chi_2$  dihedral angles in dC<sub>18:1</sub>.  $\chi_1$  is the dihedral of the backbone N, C $\alpha$ , C $\beta$ , and C $\gamma$  atoms.  $\chi_2$  is the dihedral of the C $\alpha$ , C $\beta$ , C $\gamma$ , and C $\delta$  atoms. The color scheme for the heat plots is shown on the right with  $\log\{\text{count/bin}\}$  and  $1^\circ$  bins in both dimensions.

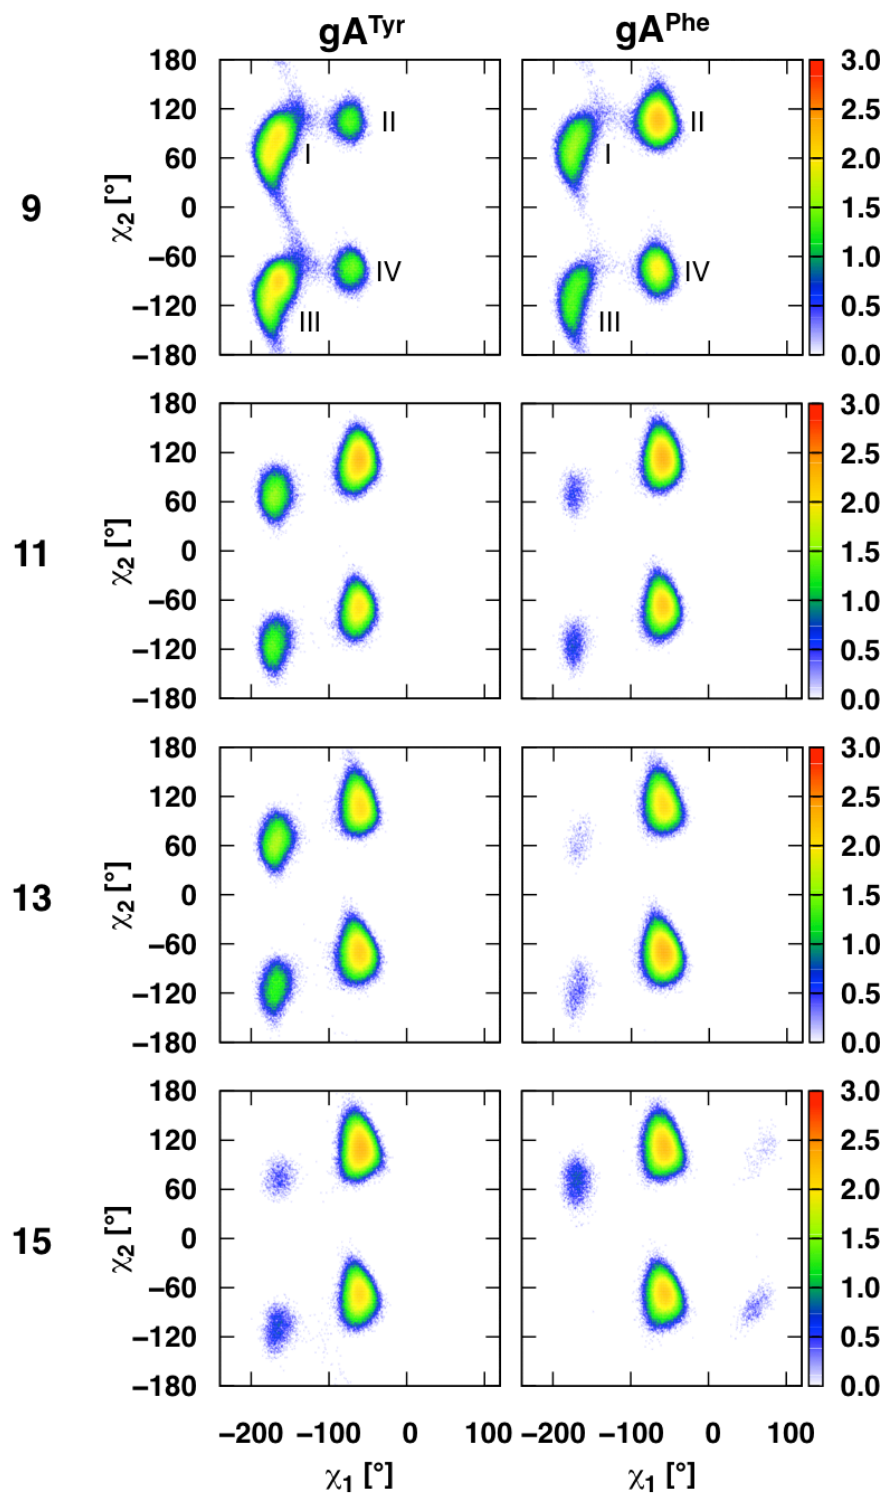

**Figure S7.** Gln and Leu  $\chi_1$ - $\chi_2$  dihedral angles in dC<sub>18:1</sub>. See the **Figure S6** caption for the figure notation.

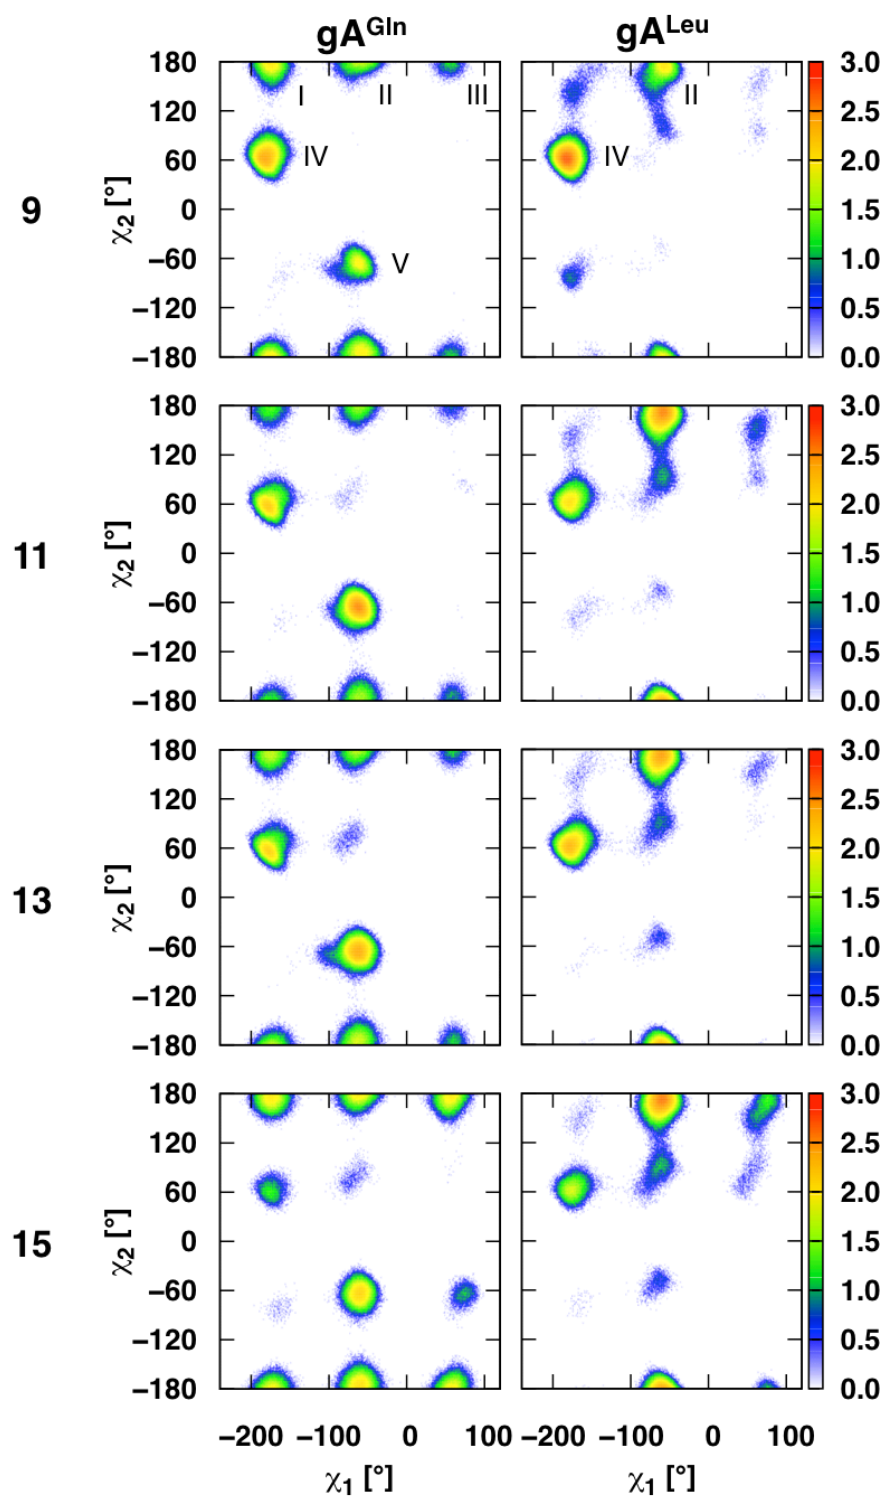

**Figure S8.** Radial distribution functions (RDFs) for  $dC_{18:1}$  lipids around each channel type with  $0.5 \text{ \AA}$  bins. The center of mass (COM) of the total lipid is in green, the location of the nitrogen (N) is in blue, and the COM of the tails only (TAIL) is in black. RDFs are normalized by the expected bulk concentration per radial bin:  $g(r) = \rho(r)/\rho_{\text{bulk}}$ .

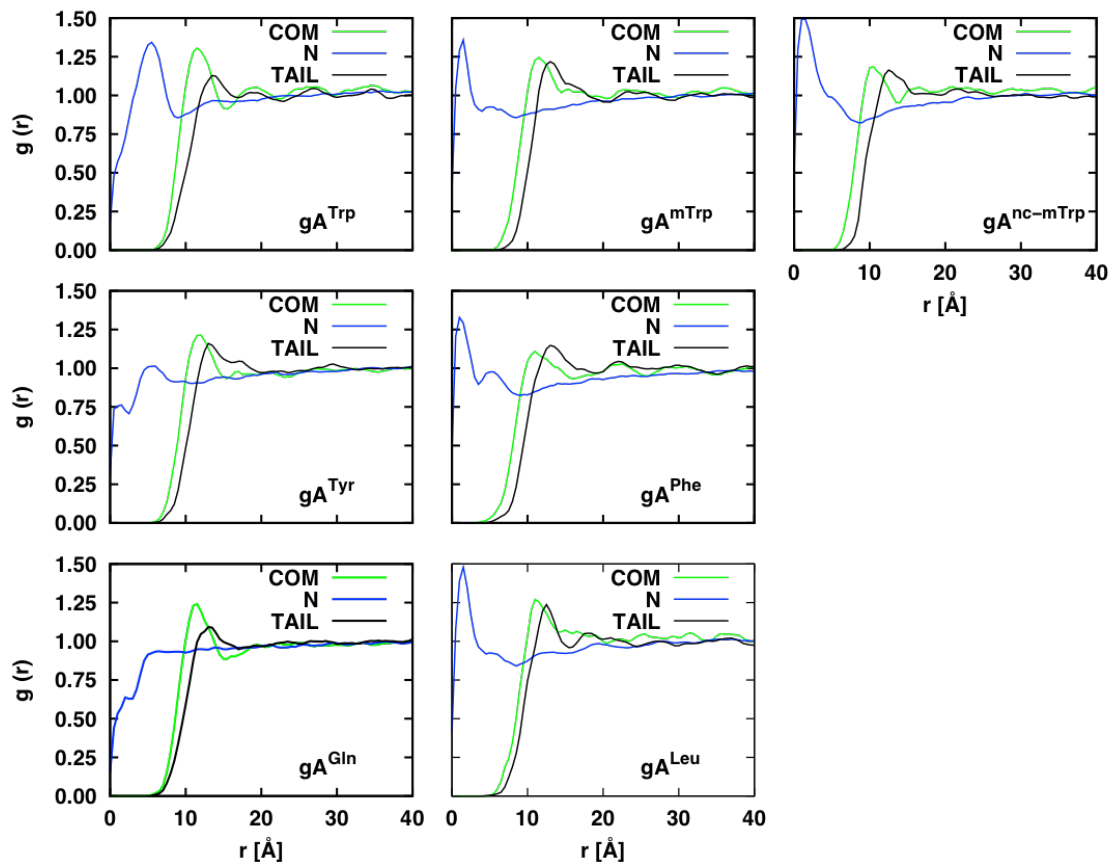

**Figure S9.** Contact plots between residue side chain heavy atoms and surrounding environments for each channel type in dC<sub>18:1</sub>. The sum of the frequencies of the considered interactions is normalized to 1.0 for each residue.

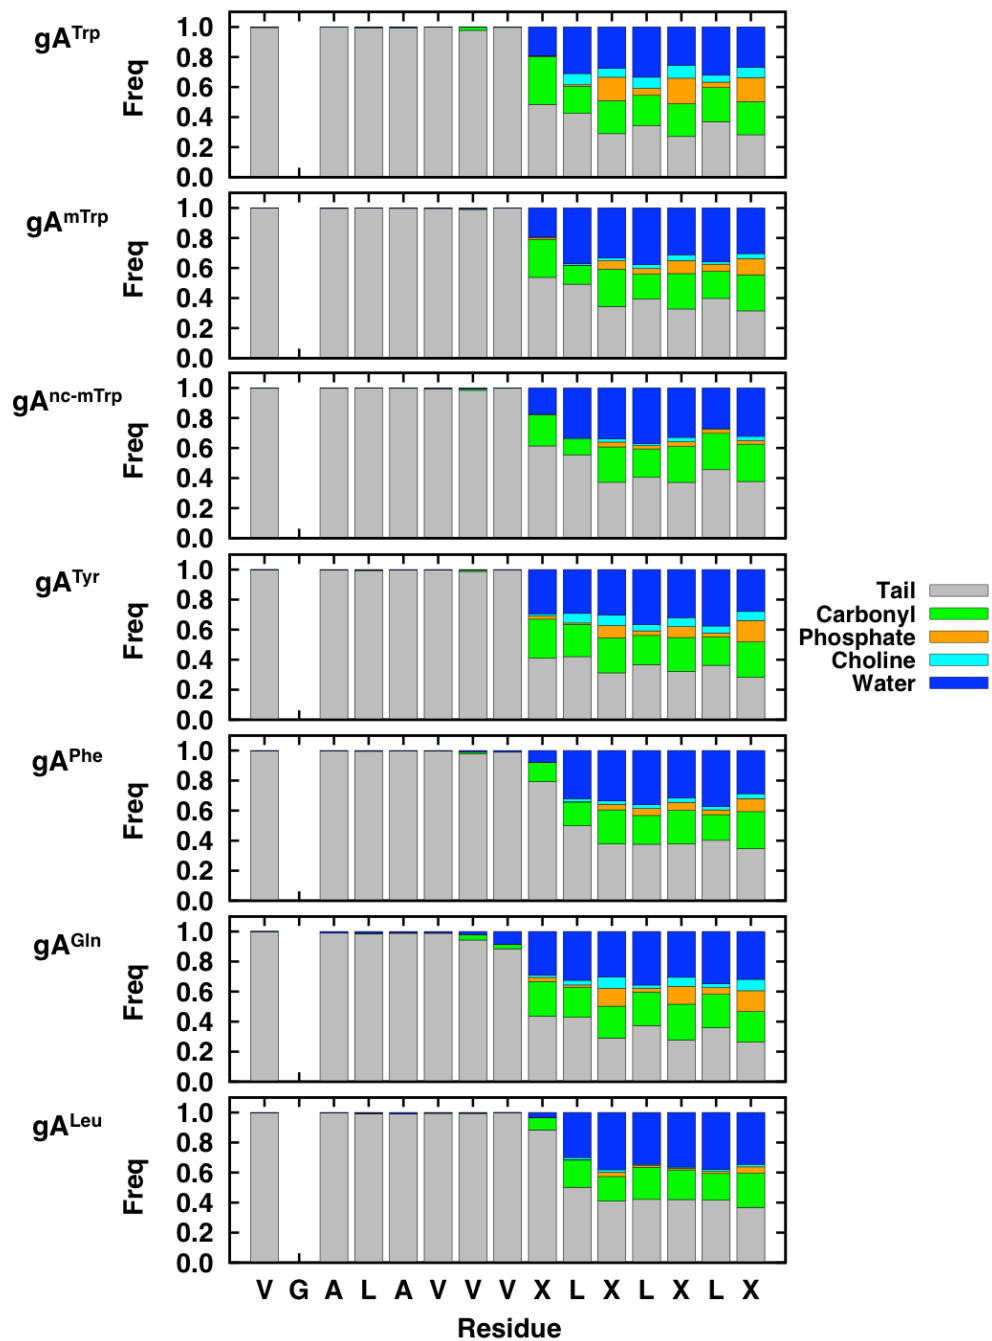

**Figure S10.** Trp  $\chi_1$ - $\chi_2$  dihedral angles in dC<sub>18:1</sub>. Since it has been shown that backbone restraints (like dCMAP) affect residue dynamics, we compare (A) a previously published simulation<sup>1</sup> of gA<sup>Trp</sup> in dC<sub>18:1</sub> using an RMSD backbone restraint (100 ns of sampling) to (B) a simulation from this study of gA<sup>Trp</sup> in dC<sub>18:1</sub> using only dCMAP (600 ns of sampling). The RMSD restraint possibly reduces the dynamics of the Trp9 residue (it fluctuates around the initial  $\chi_1$ - $\chi_2$ , which is the preferred orientation of this residue), whereas the dynamics of the other residues appear unchanged. The relative lack of sampling in the system with the RMSD restraint means that it is possible that simulation simply did not have enough time to sample other rotamer states. The true effect of a backbone restraint would have to be studied by a long timescale simulation, which is beyond the scope of this paper. Based on the  $\chi_1$ - $\chi_2$  plots, we conclude that while the backbone RMSD restraint might affect residue dynamics, it is likely minimal. See the **Figure S6** caption for the figure notation.

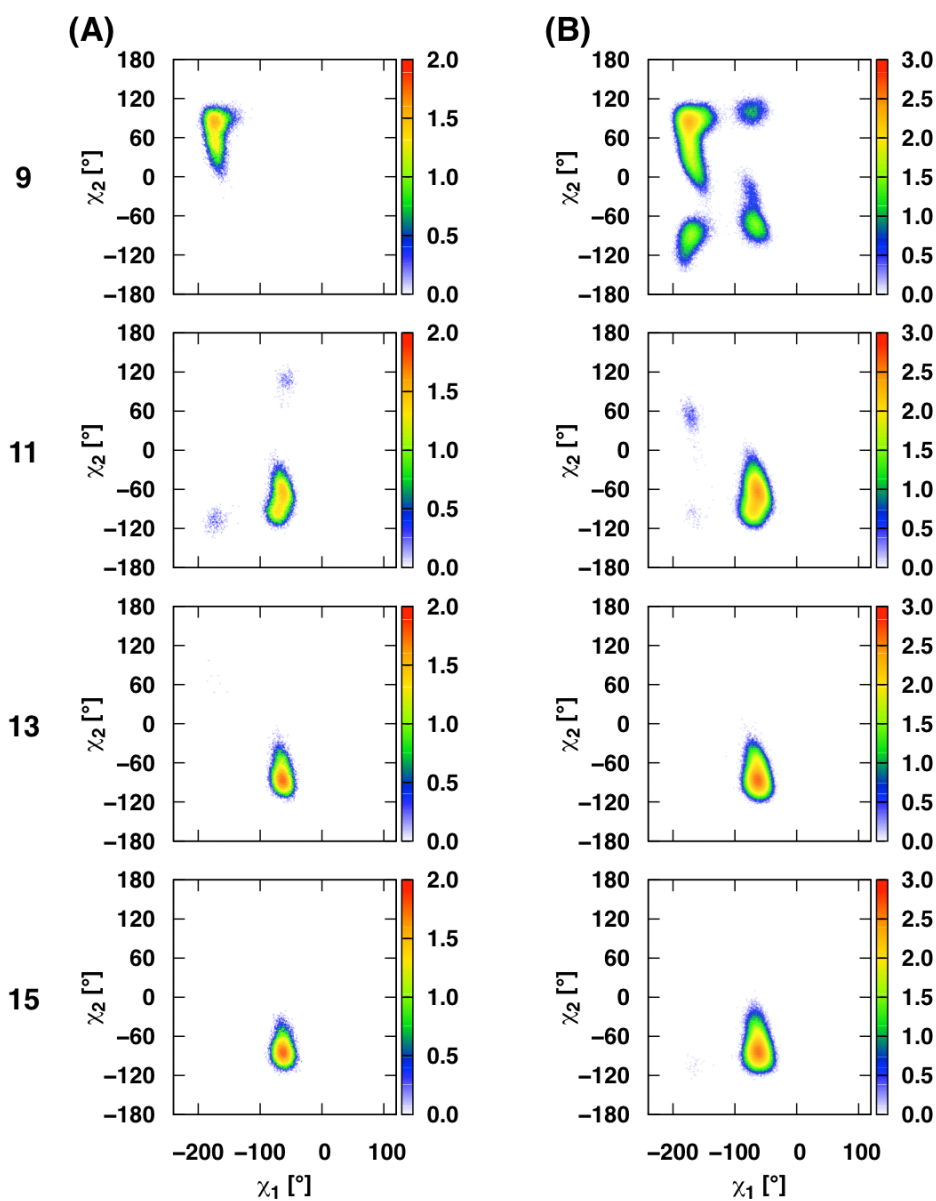

**Figure S11.** Heavy-atom  $z$ -density plots for the lipid C22 atom (black), entire channel (green), and the channel's interfacial residues (blue) in dC<sub>20:1</sub>. Dotted red lines are shown to accentuate the entire channel peak shifts relative to  $gA^{\text{Trp}}$ . Data is plotted in 0.5 Å bins. Systems were centered by shifting the bilayer's center of mass to  $z = 0$  Å.

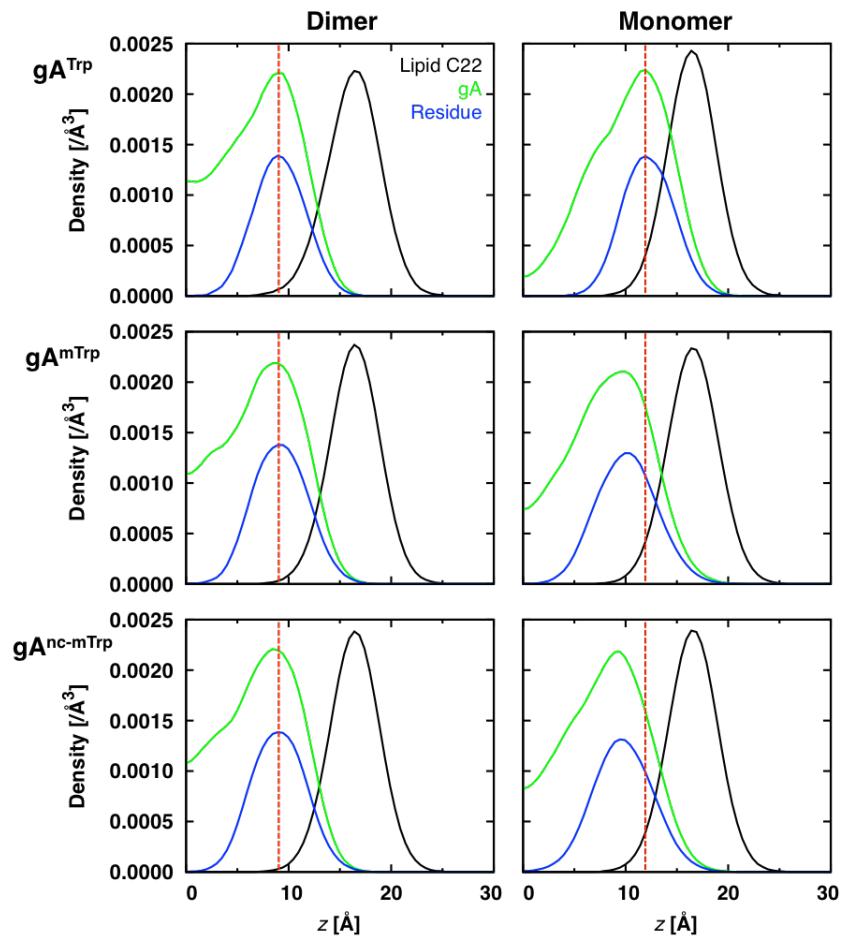



## REFERENCES

- (1) Sodt, A. J.; Beaven, A. H.; Andersen, O. S.; Im, W.; Pastor, R. W. Gramicidin A Channel Formation Induces Local Lipid Redistribution II: A 3D Continuum Elastic Model. *Biophys. J.* **2017**, *112* (6), 1198–1213.
- (2) Kim, T.; Lee, K. Il; Morris, P.; Pastor, R. W.; Andersen, O. S.; Im, W. Influence of Hydrophobic Mismatch on Structures and Dynamics of Gramicidin A and Lipid Bilayers. *Biophys. J.* **2012**, *102* (7), 1551–1560.
